# Supplementary material for: The effect of PEGylation on the stimulation of IL-1β by gold (Au) nanoshell/silica core nanoparticles
Source: Royal Society of Chemistry journal article supplement (doi:10.1039/c5tb01553g), 2015-10-20
Supplement: c5tb01553g1.pdf [file c5tb01553g1.pdf]

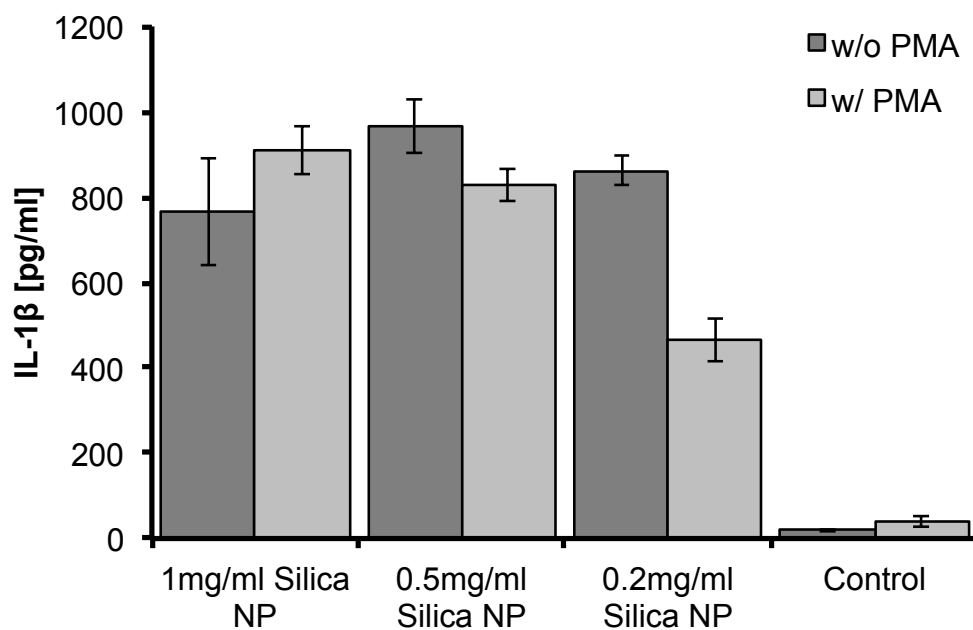

**Supplementary Figure 1.** The secretions of IL-1 $\beta$  by THP-1 cells treated with silica NP. THP-1 cells were differentiated with or without PMA prior to LPS priming, and then were stimulated with Silica NP at concentrations ranging from 0.2 mg/ml to 1 mg/ml. Untreated cells were used as a negative control (Control). IL-1 $\beta$  secreted by stimulated THP-1 cells were collected after 24 h and quantified by ELISA. Values are mean  $\pm$  S.D.
